# Supplementary material
Source: publisher site journal article supplement (https://www.dovepress.com/article/181192)
Supplement: Supplementary file 1 [file get_supplementary_file.php]

## Supplementary materials

**Table S1 Sources searched using electronic interfaces (Data were collected from English sources only)**

| Source                                                                                   |
|------------------------------------------------------------------------------------------|
| <b>Bibliographic sources</b>                                                             |
| PUBMED                                                                                   |
| Cochrane                                                                                 |
| NHS EED                                                                                  |
| CEA Registry                                                                             |
| EuroQoL                                                                                  |
| <b>Grey literature sources</b>                                                           |
| Repec                                                                                    |
| EconLit                                                                                  |
| EconStor                                                                                 |
| Oaister                                                                                  |
| International Association for the study of pain                                          |
| American Pain Society                                                                    |
| European society for medical oncology                                                    |
| ISOR Scientific presentation database                                                    |
| Value in Health Regional Issues                                                          |
| Asia Pacific Hospice Palliative Care Network                                             |
| International Agency for cancer research                                                 |
| International Association for cancer registries                                          |
| Globocan                                                                                 |
| WHO cancer mortality database                                                            |
| Global cancer observatory                                                                |
| National Institute of statistics and census (Chile)                                      |
| National Health and Wellness Survey                                                      |
| Ministry of Health (Chile)                                                               |
| National center for disease informatics and research, National cancer registry programme |
| Latin American Association for palliative Care                                           |
| WHO pain and palliative Care Communication program                                       |

International Association for Hospice and palliative Care

Ministry of health/economics of all countries

African organization for research and training in cancer

Latin American and Caribbean society for medical oncology

African palliative care association

Worldwide palliative care alliance

Multinational association for supportive care in cancer

Middle east cancer consortium

Indian Association of palliative care

Chinese society of clinical oncology

Japanese society of clinical oncology

Malaysian society of clinical oncology

Pain and palliative care society

Malaysian society of clinical oncology

Pain and palliative care society

National Cancer Institute (Brazil)

Cancer Society of Brazil

Brazilian Institute for Cancer Control

Brazilian Federation of Philanthropic Breast Health Institutions

Brazilian Association of Cancer Patients

Sociedade Brasileira de Oncologia Clínica (Brazil)

Brazilian Association for the Support of Cancer Patients

American Cancer Society

Latin American and Caribbean Society of Medical Oncology

Federation of Latin American Societies of Cancer

National Institute of Cancer Research, Taiwan

Chinese Society of Clinical Oncology

Shanghai Cancer Institute (China)

Dokuz Eylül University, Institute of Oncology (Turkey)

Arab Medical Association Against Cancer (Egypt)

National Cancer Institute (Egypt)

Breast Cancer Foundation of Egypt

Indian Cancer Society

National Cancer Registry Programme (India)

Philippine Cancer Society, Inc. (PCSI)

Japanese Association of Cancer Registries

Japan Society of Clinical Oncology

Japanese Foundation For Cancer Research

Israel National Cancer Registry

King Fahad National Centre for Children's Cancer and Research (Saudi Arabia)

Bangladesh Cancer Society

Cancer Association of South Africa

Nigerian Cancer Society

Malaysian Oncology Society

National Cancer Institute (Chile)

Random Google searches

---

## **Table S2 Search strategy and eligibility criteria**

### **Search Strategy**

Depending upon the search environment of the identified sources, search strategies were prepared using combinations of various entry terms:

#### **Disease terms**

Cancer, Neoplasm, Cyst, Neoplasia, Tumor, Malignancy, Leukemia, Lymphoma, Melanomas, Carcinoma, Sarcoma, Neoplasia, Anaplasia, Metastasis, Hamartoma, Pain

#### **Epidemiology terms**

Epidemiology, Prevalence, Incidence, Occurrence, Frequency

#### **Humanistic burden terms**

Humanistic Burden, Quality of life, Health-related quality of life, Quality adjusted life years, Healthy Years Equivalents, Adjusted Life Years, Life Quality, Disability Adjusted Life Years, Caregiver burden

#### **Economic burden terms**

Economic burden, Loss of Productivity, Loss of Work, Pay Loss, Cost of Care, Cost, Cost analysis, Cost comparison, Pricing, Cost measure, Cost of illness, Cost of care, Healthcare cost, Health care cost, Service cost, Drug cost, Health expenditure, Capital expenditure, Healthcare Expense, Hospitalization cost, Cost of Hospitalization, Economic Evaluation, Direct Cost, Indirect Cost

#### **Geographical terms**

China, Indonesia, United Arab Emirates, Philippines, Egypt, Morocco, Brazil, Algeria, Colombia, Asia, Latin America, Middle East, Africa, developing countries

No terms for type of studies were included in search strings to keep the strategies more sensitive. Study types ineligible as per the inclusion criteria were excluded during screening phase.

## **Inclusion/Exclusion Criteria**

### ***Inclusion***

- Any cancer patient
- Any settings
- Pain associated with any cancer type
- Studies Asia, Middle East, Africa and Latin America
- Epidemiological studies
- Cost studies
- Humanistic burden studies
- Interventional studies
- Observational studies
- Systematic review
- Meta-analysis
- Pooled results
- Empirical studies
- English studies
- Full text
- Published between Dec 2011 and Dec 2016

### ***Exclusion***

- Editorials, commentaries, letters, case studies, narrative review
- Cost-effectiveness analysis
- Cost-benefit analysis
- Cost-minimization analysis
- Cost-utility analysis
- Non-English study
- Non-Human study
- Qualitative study
- Cost control method
- Cost comparison
- Study focused on some specific aspect of cancer pain that could not be generalizable
- Studies including exclusively pediatric cancer patients
- Studies including patients with pain other than that associated with cancer
